# Supplementary material for: Dual Effects of Korean Red Ginseng on Astrocytes and Neural Stem Cells in Traumatic Brain Injury: The HO-1–Tom20 Axis as a Putative Target for Mitochondrial Function
Source: MDPI journal article supplement (doi:10.3390/cells11050892), 2022-03-04
Supplement: s1 [file s1]

Suplemenatry Figure S1

a

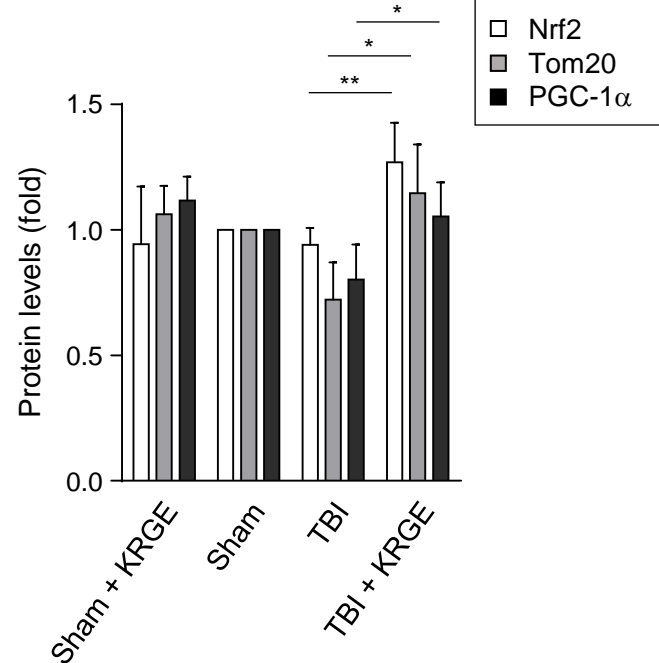

b

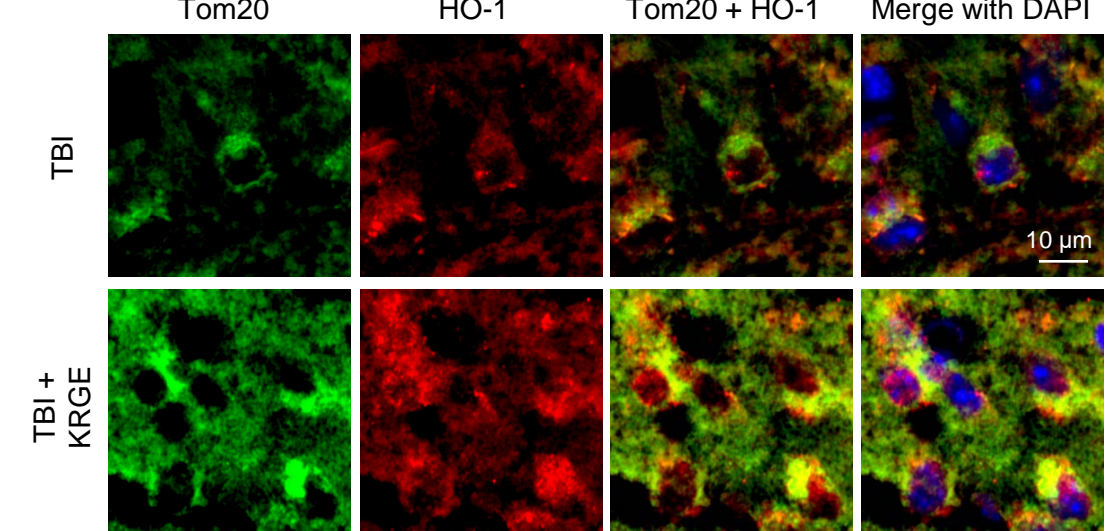

c

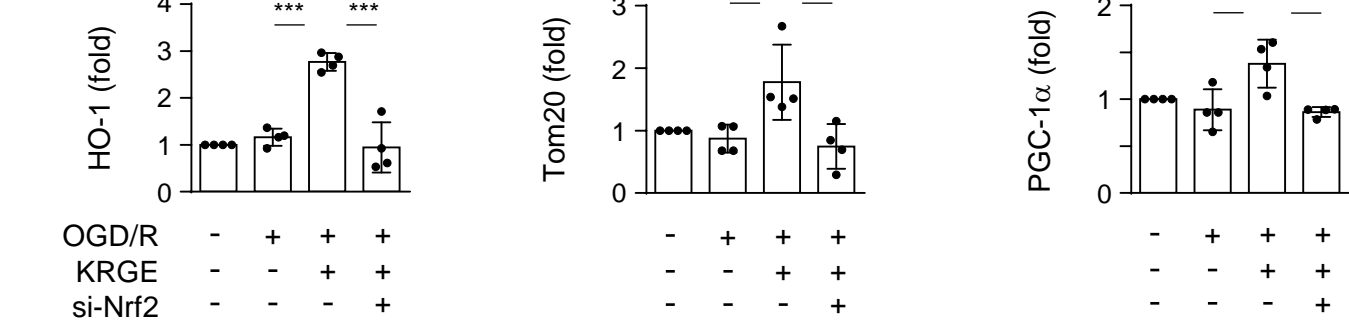

**Supplementary Figure S1. Protein expression of HO-1 and Tom20.** (a) Quantified graph obtained from brain tissues (approximately bregma -1 to -2), based on western blotting ( $n = 4$  per each group). (b) Representative images of translocase of the outer membrane of mitochondria 20 (Tom20, green) and heme oxygenase-1 (HO-1, red) in a mouse brain obtained from traumatic brain injury (TBI) and TBI followed by Korean red ginseng extract (KRGE) (TBI + KRGE) treatment ( $n = 3$  per group). 4',6-Diamidino-2-phenylindole (DAPI, blue) is used for nucleus detection (scale bar = 10 μm). (c) Quantified graph for Figure 1f is based on astrocyte cell lysate findings ( $n = 4$  independent experiments). \* $P < 0.05$ , \*\* $P < 0.01$ , and \*\*\* $P < 0.001$ .

Supplementary Figure S2

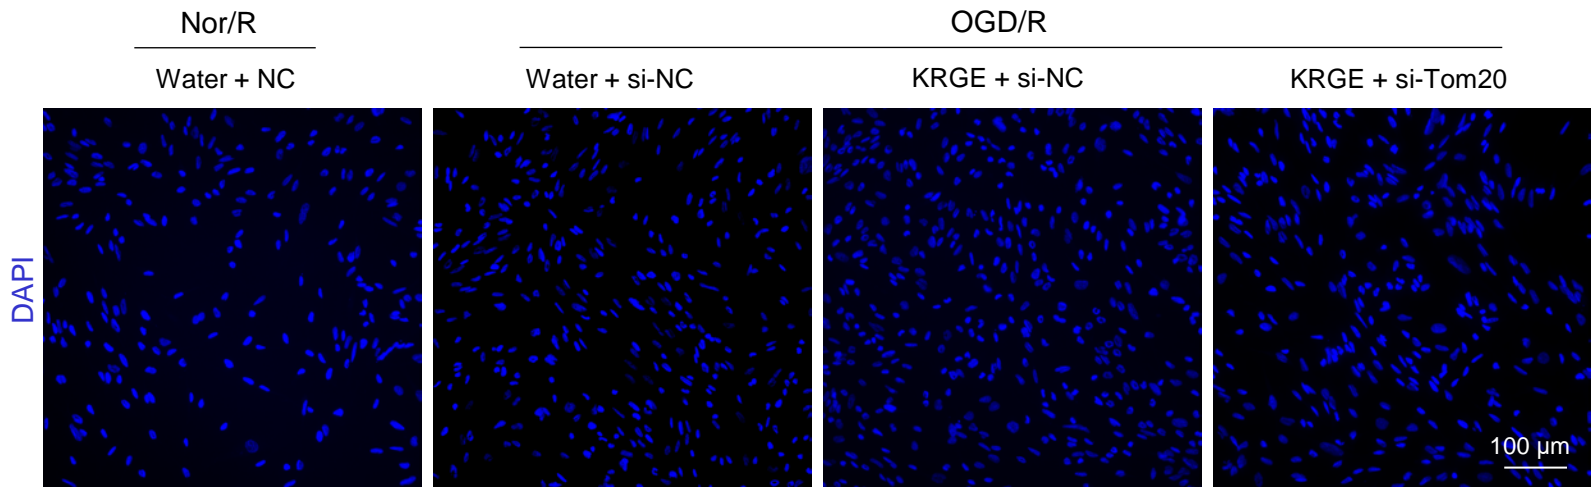

**Supplementary Figure S2. DAPI images.** Astrocytes on 12-well plates are transfected with siRNA for negative control (si-NC) or translocase of the outer membrane of mitochondria (si-Tom20), followed by oxygen-glucose deprivation/recovery (OGD/R) with or without Korean red ginseng extract (KRGE) treatment. Normoxia followed by recovery (Nor/R) is the control for OGD/R. Representative image of 4',6-diamidino-2-phenylindole (DAPI, blue) staining in human astrocytes ( $n = 3$  per group; scale bar = 100 μm).

Suplemenatry Figure Figure S3

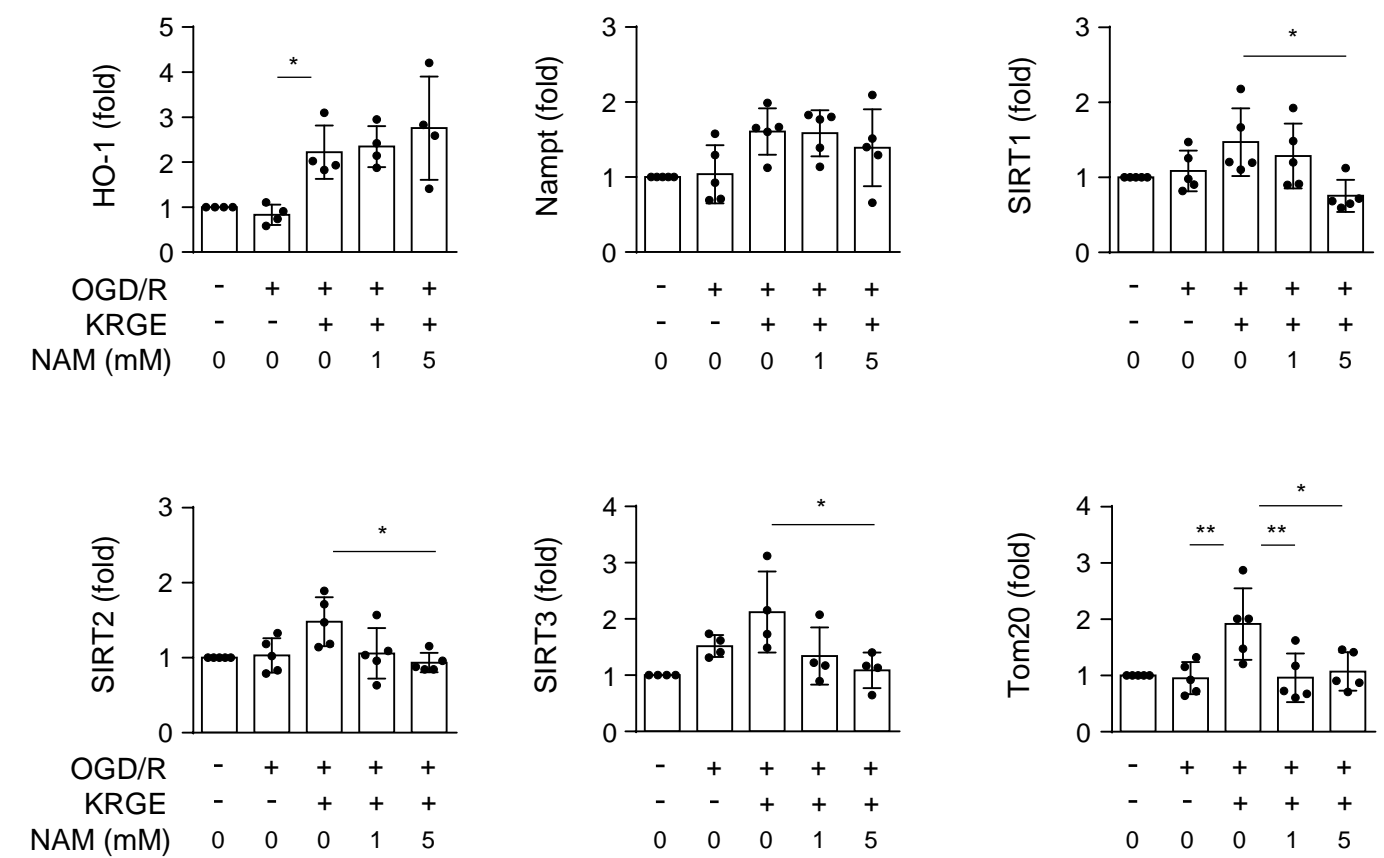

**Supplementary Figure S3. Astrocytic Tom20 expression regulated by SIRT inhibitor.** Astrocytes were subjected to 8 h oxygen-glucose deprivation (OGD), followed by recovery with 1 mM or 5 mM nicotinamide (NAM) plus Korean red ginseng extract (KRGE) for 24 h. Protein expressions in Figure 4e are quantified using ImageJ (GraphPad, San Diego, CA, USA) [e.g., heme oxygenase-1 (HO-1,  $n = 4$ ); Nampt ( $n = 5$ ); silent information regulator (SIRT1,  $n = 5$ ); SIRT2 ( $n = 5$ ); SIRT3 ( $n = 4$ ); and translocase of the outer membrane of mitochondria 20 (Tom20,  $n = 5$ )]. \* $P < 0.05$  and \*\* $P < 0.01$ .

Supplementary Figure S4

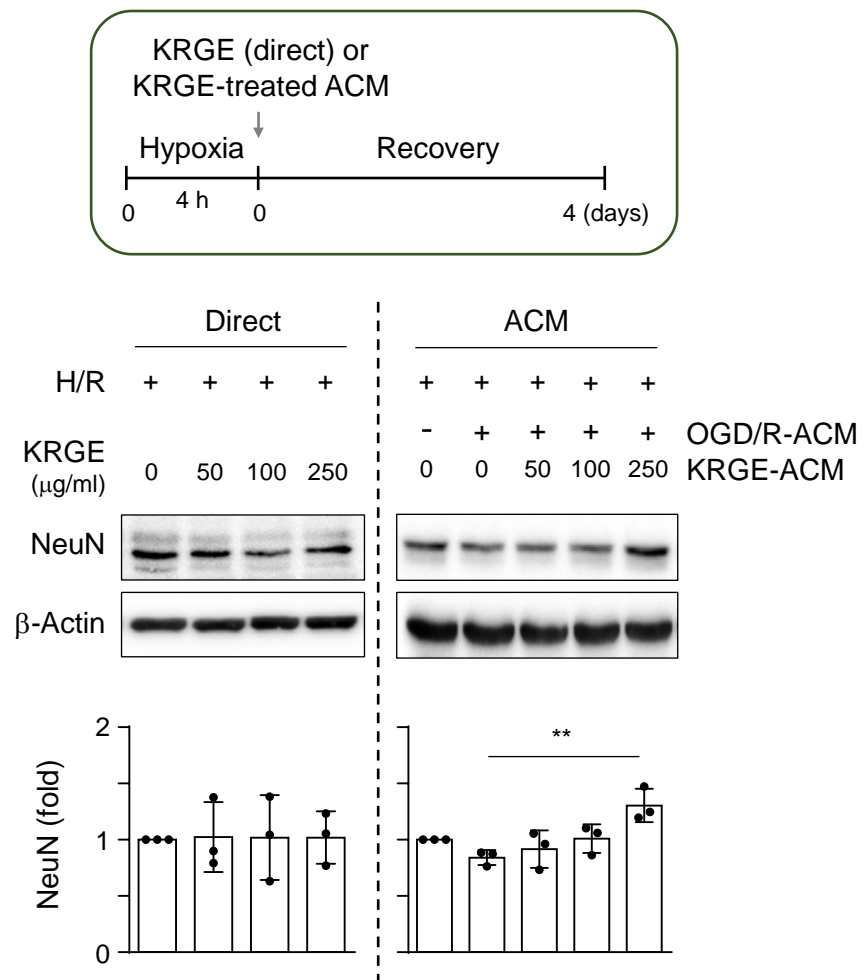

**Supplementary Figure S4. Neuronal differentiation by KRGE.** Neural stem cells (NSCs) are incubated in hypoxia for 4 h, followed by 4 days of recovery (H/R). In the recovery phase, the media are replaced with astrocytes conditioned media (ACM) and differentiation media in a 1:1 ratio. Indicated protein levels are assessed by western blotting ( $n = 3$  independent experiments). \*\* $P < 0.01$ .
